# Supplementary material for: Variability of Metabolite Levels Is Linked to Differential Metabolic Pathways in Arabidopsis's Responses to Abiotic Stresses
Source: PLoS Comput Biol. 2014 Jun 19;10(6):e1003656. doi: 10.1371/journal.pcbi.1003656 (PMC4063599; doi:10.1371/journal.pcbi.1003656)
Supplement: Supporting Information S4 — Metabolite dictionary. Given is the mapping of the metabolites between that data and the model. Some metabolites have two possible metabolites IDs in the model. Note that a metabolite ID is not unique and the same metabolite can participate in reactions in different compartments. (XLS) [file pcbi.1003656.s004.xls]

## Sheet: Sheet1
Supporting Information S4
Metabolite ID in model	Metabolite Name in model	Metabolite ID in model	Metabolite Name in model	Row in data	Metabolite name in data
59	4-aminobutyrate			33	4-Aminobutyric acid (3TMS)
102	O-acetyl-L-serine			26	O-acetyl-serine (2TMS)
139	L-ascorbate			71	Ascorbic acid (4TMS)
140	L-asparagine			38	Asparagine (4TMS) MP
140	L-asparagine			49	Asparagine (3TMS)
142	beta-alanine			25	beta-alanine (3TMS)
143	benzoate			16	Benzoic acid (2TMS)
150	L-Ornithine	941	L-ornithine	52	Ornithine (4TMS)
207	(R)-2-hylmalate			29	Citramalic acid (3TMS)
426	citrate			61	Citric acid (4TMS)
453	raffinose			100	Raffinose
485	monodehydroascorbate	929	L-dehydro-ascorbate	70	Dehydroascorbic acid
522	galactinol			95	Galactinol (9TMS)
730	D-alanine	919	L-alanine	3	Alanine (2TMS)
735	D-glucose			63	Glucose (1MEOX) (5TMS) BP
736	D-lactate	940	lactate	1	Lactic acid (2TMS)
742	D-serine	1114	L-serine	17	Serine (3TMS)
742	D-serine	1114	L-serine	37	Serine (4TMS)
810	ethanolamine			10	Ethanolamine
827	D-fructose			54	Fructose (1MEOX) (5TMS) MP
827	D-fructose			56	Fructose (1MEOX) (5TMS) BP
830	fumarate			20	Fumaric acid (2TMS)
849	L-glutamine			40	Glutamine [-H2O] (3TMS) MP
849	L-glutamine			62	Glutamine (3TMS)
850	L-glutamate	161	DL-Glutamate	43	Glutamic acid (3TMS)
858	glycine			6	Glycine (2TMS)
858	glycine			14	Glycine (3TMS)
860	glycerol			11	Glycerol (3TMS)
863	glycolate			2	Glycolic acid (2TMS)
892	L-isoleucine			13	Isoleucine (2TMS)
902	indole-3-acetonitrile			78	Indole-3-acetonitrile (1TMS)
918	L-4-hydroxy-proline			32	Hydroxyproline (3TMS)
920	L-arabinose			41	Arabinose (1MEOX) (4TMS) MP
921	L-arabitol			42	Arabitol (5TMS)
923	L-aspartate			35	Aspartic acid (3TMS)
927	citrulline	137	L-arginine	64	Citrulline or Arginine
933	L-galactose			58	Galactose (1MEOX) (5TMS) MP
949	L-leucine			12	Leucine (2TMS)
954	L-lysine			66	Lysine (4TMS)
955	malate			31	Malic acid (3TMS)
958	maltose			90	Maltose (1MEOX) (8TMS) MP
958	maltose			92	Maltose (1MEOX) (8TMS) BP
961	mannitol			55	Mannitol (6TMS)
969	L-hionine			39	hionine (2TMS)
982	myo-inositol			72	myo-Inositol (6TMS)
1033	palmitate			76	Palmitic acid
1039	L-phenylalanine			47	Phenylalanine (2TMS)
1061	L-proline			15	Proline (2TMS)
1072	putrescine			44	Putrescine (4TMS)
1078	pyruvate			4	Pyruvic acid (1MEOX) (1TMS)
1115	shikimate			57	Shikimic acid (4TMS)
1128	succinate			18	Succinic acid (2TMS)
1131	sucrose			89	Sucrose (8TMS)
1144	L-threonine			19	Threonine (3TMS)
1153	trehalose			91	Trehalose
1159	L-tyrosine			73	Tyrosine (3TMS)
1174	uracil			24	Uracil (2TMS)
1180	L-valine			9	Valine (2TMS)
				5	Unknown 01
				7	Similar to n-Dodecane
				8	Guanidine (3TMS)
				21	Maleic acid (2TMS)
995	nicotinate			22	Nicotinic acid (1TMS)
				23	Itaconic acid (2TMS)
				27	Erythritol (4TMS)
				28	Unknown 02
				30	Unknown 03
				34	Unknown 04
				36	Threonic acid (4TMS)
				45	Fucose (1MEOX) (4TMS) MP
22	alpha-ketoglutarate			46	Similar to 2-Oxoglutaric acid
				48	4-hydroxy-benzoic acid (2TMS)
				50	1,6-Anhydro-beta-D-glucose (3TMS)
				51	Similar to Uridine-5-diphosphoglucose disodium salt
				53	Unknown 06
				59	Unknown 07
				60	Altrose (1MEOX) (5TMS) MP
				65	Unknown 08
				67	Similar to Tetradecanoic acid (1TMS)
929	L-dehydro-ascorbate			68	Dehydroascorbic acid dimer (2MEOX) MP
				69	Gluconic acid (6TMS)
107	adenine			74	Similar to Adenine (2TMS)
				75	4-Hydroxycinnamic acid (2TMS)
				77	Unknown 11 (simiar to ribulose-5-phosphate)
1123	spermidine			79	Similar to Spermidine (5TMS)
				80	Similar to Uric acid (4TMS)
				81	Unknown 12
1118	sinapate			82	Sinapic acid (trans)
				83	Unknown 13
				84	Octadecanoic acid (1TMS)
				85	Unknown 15
				86	Unknown 16
1118	sinapate			87	Sinapic acid (cis)
				88	Unknown 17
				93	Docosanoic acid (1TMS)
				94	Unknown 18
				96	Unknown 19
				97	Tetracosanoic acid (1TMS)
				98	Unknown 20
				99	Hexacosanoic acid (1TMS)
				101	Octacosanoic acid (1TMS)
Metabolite dictionary: Given is the mapping of the metabolites between that data and the model. Some Metabolites have two possible metabolites IDs in the model. Note that a metabolite ID is not unique and the same metabolite can participate in reactions in different compartments.
